# Supplementary material for: Factors Associated With Unmet Supportive Care Needs and Emergency Department Visits and Hospitalizations in Ambulatory Oncology
Source: PubMed Central journal article supplement (PMC10285575; doi:10.1001/jamanetworkopen.2023.19352), 2023-06-21

## Supplementary Online Content

Penedo FJ, Natori A, Fleszar-Pavlovic SE, et al. Factors associated with unmet supportive care needs and emergency department visits and hospitalizations in ambulatory oncology. *JAMA Netw Open*. 2023;6(6):e2319352.  
doi:10.1001/jamanetworkopen.2023.19352

**eTable 1.** Factors Associated With Emergency Room Visits and Hospital Admissions

**eTable 2.** Clinical Outcomes Associations With Incomplete BPAs, Completed BPAs, and No Unmet Needs Endorsed

**eTable 3.** Details of PROMIS-CATs

**eTable 4.** List of Options in the Supportive Care Needs Assessment

**eFigure 1.** Cumulative Incidence of ER Visits Among Patients With Incomplete BPAs, Patients With Completed BPAs, and Patients With No Unmet Needs Endorsed

**eFigure 2.** Cumulative Incidence of Hospital Admissions Among Patients With Incomplete BPAs, Patients With Completed BPAs, and Patients With No Unmet Needs Endorsed

This supplementary material has been provided by the authors to give readers additional information about their work.

**eTable 1. Factors Associated With Emergency Room Visits and Hospital Admissions**

| ER visit                    | Univariate       |         | Multivariate     |         |
|-----------------------------|------------------|---------|------------------|---------|
| Predictor                   | HR (95%CI)       | P value | HR (95%CI)       | P value |
| Age                         | 0.99 (0.98-0.99) | 0.004   | 0.99 (0.98-0.99) | 0.002   |
| Male (vs. Female)           | 0.97 (0.94-1.12) | 0.66    | NA               | NA      |
| Race                        |                  |         |                  |         |
| White (ref)                 | -                | -       | -                | -       |
| Black                       | 1.43 (1.13-1.82) | 0.003   | 1.60 (1.22-2.09) | <.001   |
| Other                       | 0.99 (0.67-1.48) | 0.98    | 1.20 (0.79-1.82) | 0.40    |
| Hispanic (vs. Non-Hispanic) | 0.45 (1.25-1.68) | <.001   | 1.39 (1.17-1.66) | <.001   |
| Charlson Score              | 1.17 (1.15-1.20) | <.001   | 1.16 (1.13-1.18) | <.001   |
| Uninsured (vs. insured)     | 1.65 (1.02-2.66) | 0.04    | 1.16 (0.64-2.11) | 0.62    |
| Active treatment            | 2.64 (2.15-3.23) | <.001   | 2.08 (1.67-2.59) | <.001   |
| Patient-reported outcomes   |                  |         |                  |         |
| Anxiety                     | 2.19 (1.80-2.66) | <.001   | 1.49 (1.14-1.96) | 0.004   |
| Depression                  | 1.98 (1.63-2.41) | <.001   | 0.94 (0.71-1.25) | 0.67    |
| Pain                        | 2.78 (2.15-3.60) | <.001   | 1.39 (0.98-1.98) | 0.07    |
| Fatigue                     | 2.09 (1.50-2.91) | <.001   | 0.92 (0.62-1.38) | 0.71    |
| Declined physical function  | 2.55 (2.11-3.09) | <.001   | 1.54 (1.20-1.99) | <.001   |
| Unmet supportive care needs | 1.85 (1.58-2.17) | <.001   | 1.45 (1.20-1.74) | <.001   |
| Hospitalization             | Univariate       |         | Multivariate     |         |
| Predictor                   | HR (95%CI)       | P value | HR (95%CI)       | P value |
| Age                         | 0.99 (0.98-0.99) | <.001   | 0.98 (0.97-0.99) | <.001   |
| Male (vs. Female)           | 1.20 (1.04-1.39) | 0.01    | 1.53 (1.15-1.80) | <.001   |
| Race                        |                  |         |                  |         |
| White (ref)                 | -                | -       | -                | -       |
| Black                       | 1.35 (1.06-1.72) | 0.01    | 1.63 (1.24-2.13) | <.001   |
| Other                       | 0.98 (0.66-1.46) | 0.92    | 1.39 (0.94-2.07) | 0.10    |
| Ethnicity                   |                  |         |                  |         |
| Non-Hispanic (ref)          | -                | -       | -                | -       |
| Hispanic                    | 1.17 (1.01-1.36) | 0.03    | 1.23 (1.03-1.47) | 0.02    |
| Charlson Score              | 1.20 (1.18-1.22) | <.001   | 1.16 (1.14-1.19) | <.001   |
| Uninsured (vs. insured)     | 1.57 (0.96-2.58) | 0.07    | 1.25 (0.72-2.18) | 0.42    |
| Active treatment            | 7.25 (5.34-9.83) | <.001   | 5.88 (4.25-8.11) | <.001   |
| Patient-reported outcomes   |                  |         |                  |         |
| Anxiety                     | 1.67 (1.35-2.07) | <.001   | 0.96 (0.71-1.29) | 0.78    |
| Depression                  | 1.80 (1.46-2.01) | <.001   | 0.99 (0.73-1.33) | 0.94    |
| Pain                        | 2.35 (1.79-3.08) | <.001   | 1.14 (0.79-1.65) | 0.48    |
| Fatigue                     | 2.10 (1.51-2.92) | <.001   | 1.03 (0.70-1.54) | 0.87    |
| Declined physical function  | 2.50 (2.06-3.03) | <.001   | 1.59 (1.24-2.05) | <.001   |
| Unmet supportive care needs | 1.73 (1.47-2.05) | <.001   | 1.36 (1.13-1.63) | 0.001   |

CI; confidence interval, HR; hazard ratio, ref: reference

**eTable 2.** Clinical Outcomes Associations With Incomplete BPAs, Completed BPAs, and No Unmet Needs Endorsed

| Predictor                  | ER visit          |         | Hospitalization  |         |
|----------------------------|-------------------|---------|------------------|---------|
|                            | aHR (95%CI)       | P value | aHR (95%CI)      | P value |
| Age                        | 0.99 (0.98-0.10)  | 0.001   | 0.98 (0.97-0.99) | <.001   |
| Male (vs. Female)          | 1.13 (0.95 -1.33) | 0.16    | 1.52 (1.28-1.80) | <.001   |
| Race                       |                   |         |                  |         |
| White (ref)                | -                 | -       | -                | -       |
| Black                      | 1.60 (1.22-2.10)  | <.001   | 1.61 (1.23-2.12) | <.001   |
| Other                      | 1.21 (0.79-1.83)  | 0.38    | 1.41 (0.95-2.09) | 0.09    |
| Ethnicity                  |                   |         |                  |         |
| Non-Hispanic (ref)         | -                 | -       | -                | -       |
| Hispanic                   | 1.41 (1.19-1.69)  | <.001   | 1.22 (1.02-1.46) | 0.03    |
| Charlson Score             | 1.15 (1.13-1.18)  | <.001   | 1.17 (1.14-1.19) | <.001   |
| Uninsured (vs. insured)    | 1.21 (0.66-2.20)  | 0.54    | 1.31 (0.75-2.28) | 0.34    |
| Active treatment           | 2.12 (1.70-2.64)  | <.001   | 5.93 (4.28-8.23) | <.001   |
| Patient-reported outcomes  |                   |         |                  |         |
| Anxiety                    | 1.50 (1.14-1.97)  | 0.004   | 0.97 (0.72-1.31) | 0.86    |
| Depression                 | 0.96 (0.72-1.29)  | 0.79    | 0.99 (0.73-1.35) | 0.96    |
| Pain                       | 1.36 (0.95-1.95)  | 0.09    | 1.13 (0.78-1.6)  | 0.52    |
| Fatigue                    | 0.93 (0.63-1.39)  | 0.93    | 1.04 (0.69-1.55) | 0.85    |
| Declined physical function | 1.56 (1.21-2.02)  | <.001   | 1.62 (1.25-2.09) | <.001   |
| Unmet SCN BPA status       |                   |         |                  |         |
| Completed BPA (ref)        | -                 | -       | -                | -       |
| Incomplete BPA             | 1.84 (0.97-3.50)  | 0.06    | 1.87 (0.98-3.56) | 0.06    |
| No SCN endorsed            | 0.71 (0.59-0.86)  | <.001   | 0.78 (0.64-0.95) | 0.02    |

aHR: adjusted hazard ratio, ref: reference, SCN: supportive care needs

**eTable 3.** Details of PROMIS-CATs

| Domain            | Item Bank                                                | Number of items in the item bank | Number of items to be administered* |
|-------------------|----------------------------------------------------------|----------------------------------|-------------------------------------|
| Anxiety           | PROMIS Bank v1.0                                         | 29                               | 4-12                                |
| Depression        | PROMIS Bank v1.0                                         | 28                               | 4-12                                |
| Pain Interference | PROMIS Bank v1.1                                         | 95                               | 4-12                                |
| Fatigue           | PROMIS Bank v1.0                                         | 40                               | 4-12                                |
| Physical Function | PROMIS Bank v2.0 (English)<br>PROMIS Bank v1.2 (Spanish) | 165                              | 4-12                                |

\*PROMIS measures are administered by a computerized adaptive test (CAT). CAT is a type of measure in which questions a person answers are tailored to that person by item response theory. CATs begin from an item bank which is a collection of items (questions) all measuring the same function/symptom and these items are ordered by level of difficulty/severity from low to high. CATs administer the first item which is one in the middle of the range of function/symptom severity. After the first response, the CAT algorithm using IRT selects the best item in the item bank based on an estimated score obtained by the prior response. The items are assigned until a standard error of 2 or less has been reached or 12 items were answered.

**eTable 4.** List of Options in the Supportive Care Needs Assessment

|                                                                                                                                                        |
|--------------------------------------------------------------------------------------------------------------------------------------------------------|
| Prompt "I would like for a treatment team member to contact me for help with (check all that apply):"                                                  |
| No needs at this time                                                                                                                                  |
| Support to help me cope with my illness and/or manage stress                                                                                           |
| Financial/insurance concerns about my health care                                                                                                      |
| Transportation resources                                                                                                                               |
| General education and information                                                                                                                      |
| Advance directives: medical actions to be taken if my health prevents me from making decisions (living will, power of attorney, health care surrogate) |
| Family problems/family health concerns                                                                                                                 |
| Sexual health concerns                                                                                                                                 |
| Housing needs/concerns                                                                                                                                 |
| Oncofertility (ability to have children)                                                                                                               |
| Work/school concerns                                                                                                                                   |
| Spiritual/religious concerns                                                                                                                           |
| Childcare                                                                                                                                              |

**eFigure 1.** Cumulative Incidence of ER Visits Among Patients With Incomplete BPAs, Patients With Completed BPAs, and Patients With No Unmet Needs Endorsed

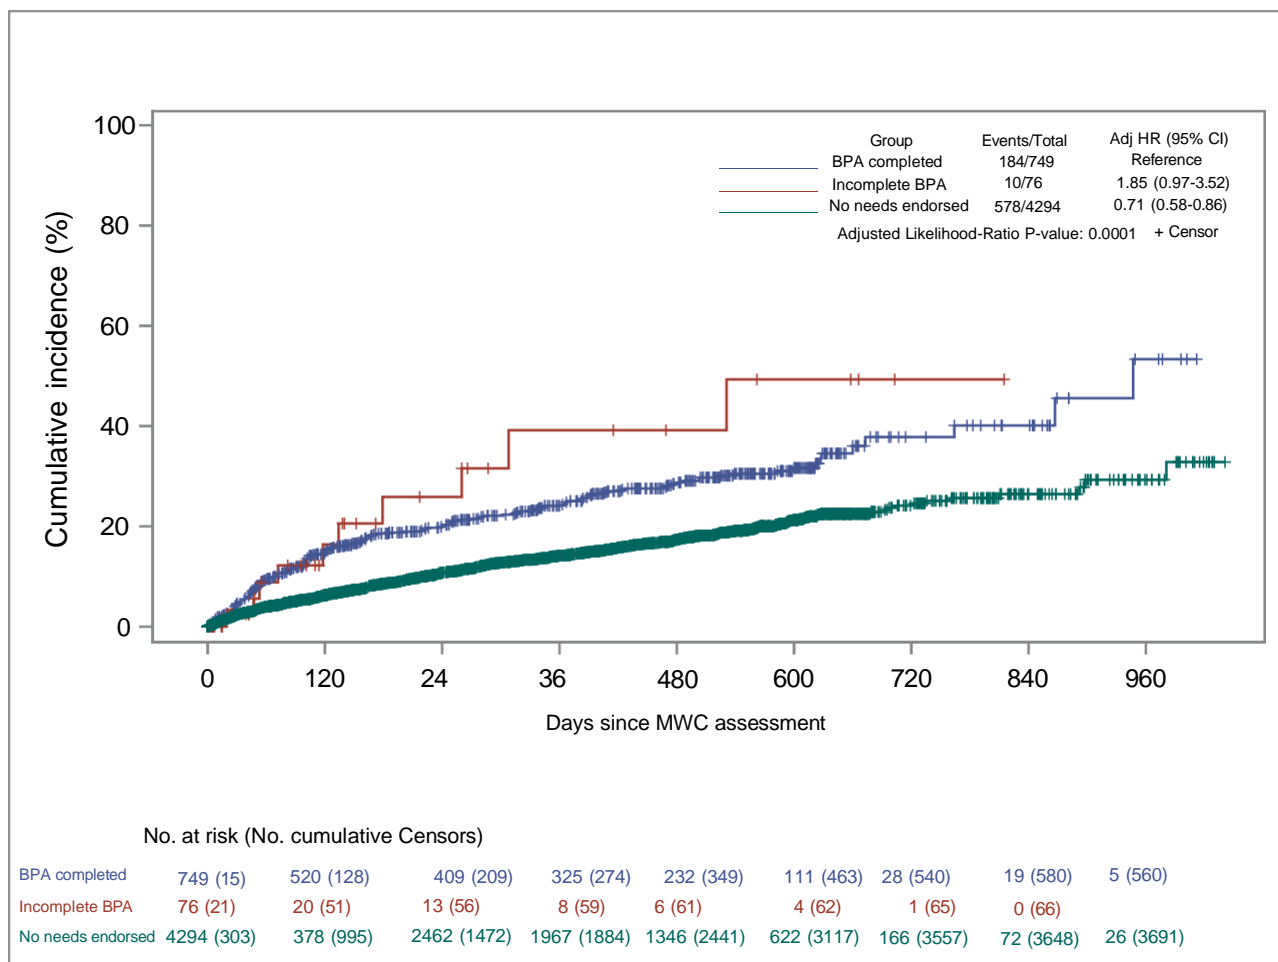

**eFigure 2.** Cumulative Incidence of Hospital Admissions Among Patients With Incomplete BPAs, Patients With Completed BPAs, and Patients With No Unmet Needs Endorsed

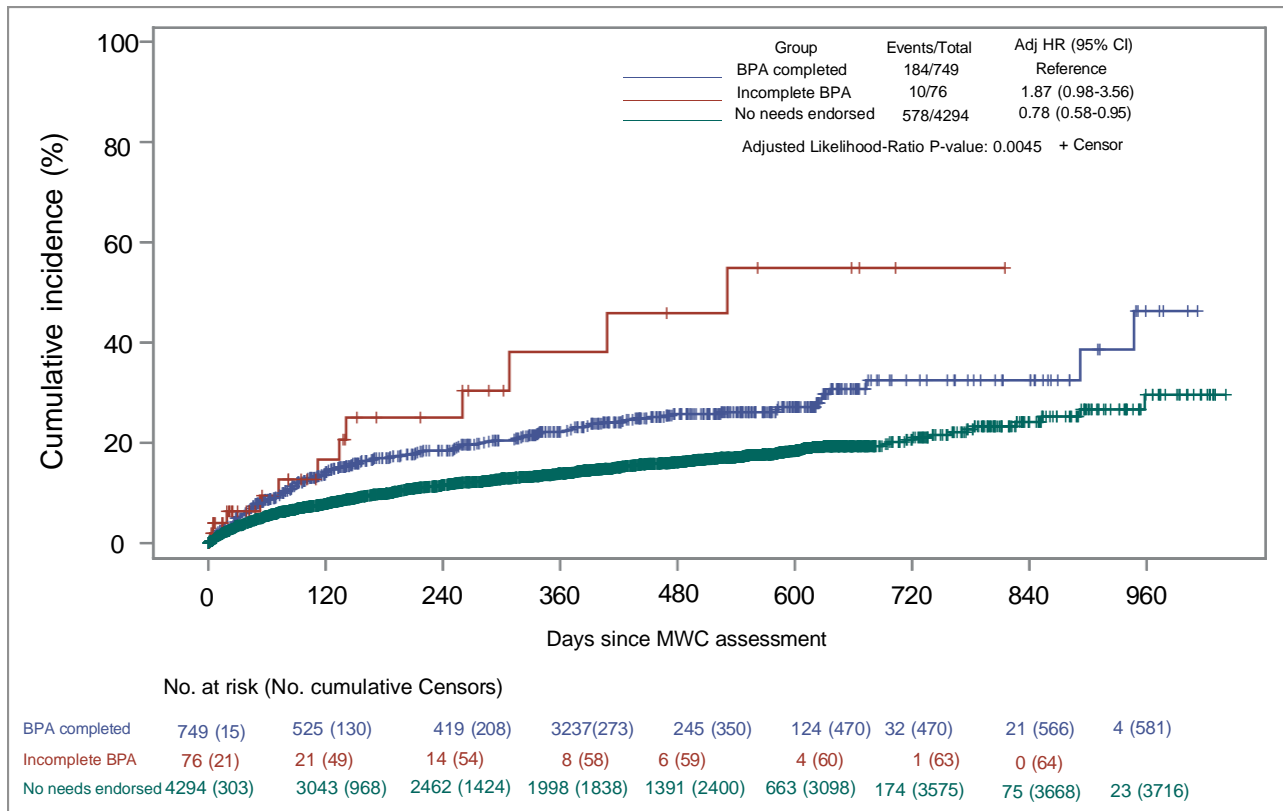

Supplement: jamanetwopen-e2319352-s001.pdf [file jamanetwopen-e2319352-s001.pdf]
