# Supplementary material for: Factors Associated With Unmet Supportive Care Needs and Emergency Department Visits and Hospitalizations in Ambulatory Oncology
Source: PubMed Central journal article supplement (PMC10285575; doi:10.1001/jamanetworkopen.2023.19352), 2023-06-21
Supplement: jamanetwopen-e2319352-s002.pdf [file jamanetwopen-e2319352-s002.pdf]

## Data Sharing Statement

Penedo. Factors Associated With Unmet Supportive Care Needs and Emergency Department Visits and Hospitalizations in Ambulatory Oncology. *JAMA Netw Open*. Published June 21, 2023. doi:10.1001/jamanetworkopen.2023.19352

### Data

**Data available:** No
